# Supplementary material for: Ablation of hepatic malignant tumors with irreversible electroporation: A systematic review and meta-analysis of outcomes
Source: PubMed Central journal article supplement (PMC5351595; doi:10.18632/oncotarget.14030), 2016-12-20
Supplement: oncotarget-08-5853-s001.pdf [file oncotarget-08-5853-s001.pdf]

# Ablation of hepatic malignant tumors with irreversible electroporation: A systematic review and meta-analysis of outcomes

## SUPPLEMENTARY DATA

### Search strategy

Pubmed (1950-present)

1. 'irreversible electroporation' OR IRE OR nanoknife
2. liver OR hepar OR hepatic
3. 1 AND 2
4. 'electroporation'[Mesh]
5. 'liver'[Mesh]
6. 4 AND 5
7. 3 OR 6

Embase(1980-present)

1. 'irreversible electroporation':ab,ti
2. 'IRE':ab,ti
3. 'nanoknife':ab,ti
4. 1 OR 2 OR 3
5. 'liver':ab,ti
6. 'hepar':ab,ti
7. 'hepatic':ab,ti
8. 5 OR 6 OR 7
9. 4 AND 8

Scoups

1. TITLE-ABS-KEY ('irreversible electroporation')
2. TITLE-ABS-KEY ('IRE')
3. TITLE-ABS-KEY ('nanoknife')
4. 1 OR 2 OR 3

5. TITLE-ABS-KEY ('liver')
6. TITLE-ABS-KEY ('hepar')
7. TITLE-ABS-KEY ('hepatic')
8. 5 OR 6 OR 7
9. 4 AND 8

Web of science

1. TS=(electroporation)
2. TS=(liver)
3. 1 AND 2
4. TI=(irreversible electroporation)
5. TI=(IRE)
6. TI=( nanoknife)
7. 4 OR 5 OR 6
8. TI=(liver)
9. TI=(hepar)
10. TI=(hepatic)
11. 8 OR 9 OR 10
12. 7 AND 11
13. 3 OR 12

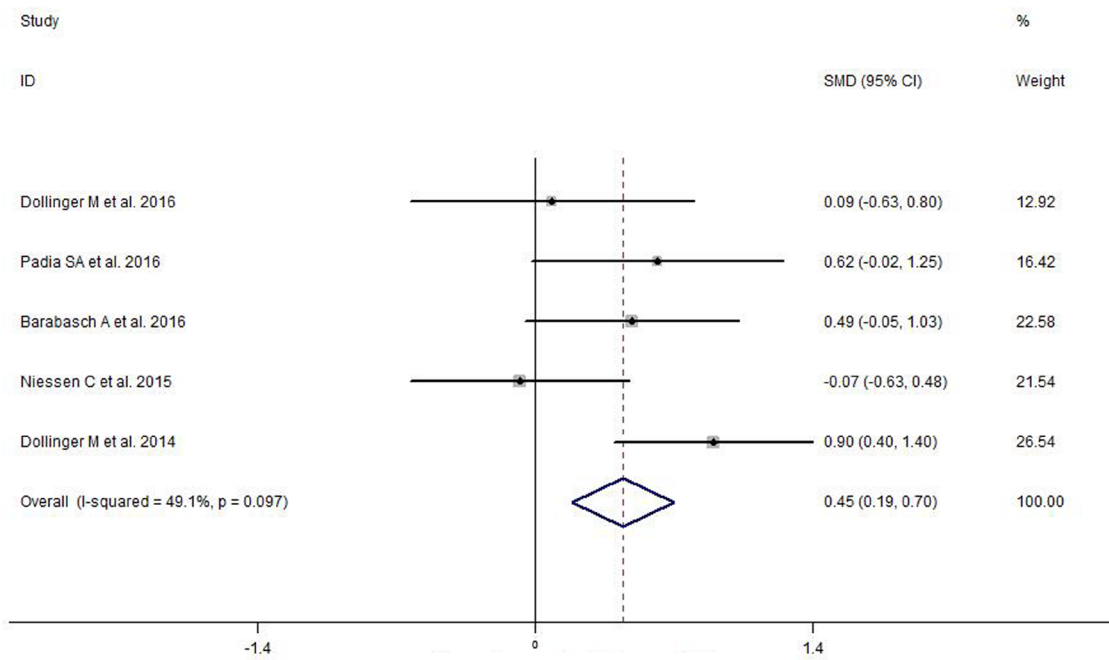

**Supplementary Figure 1: Longest diameter change of tumors before and last follow-up month after IRE treatment.** Comparing with the initial largest diameter, the post-IRE longest diameter showed the decreased response at last follow-up month after IRE treatment.

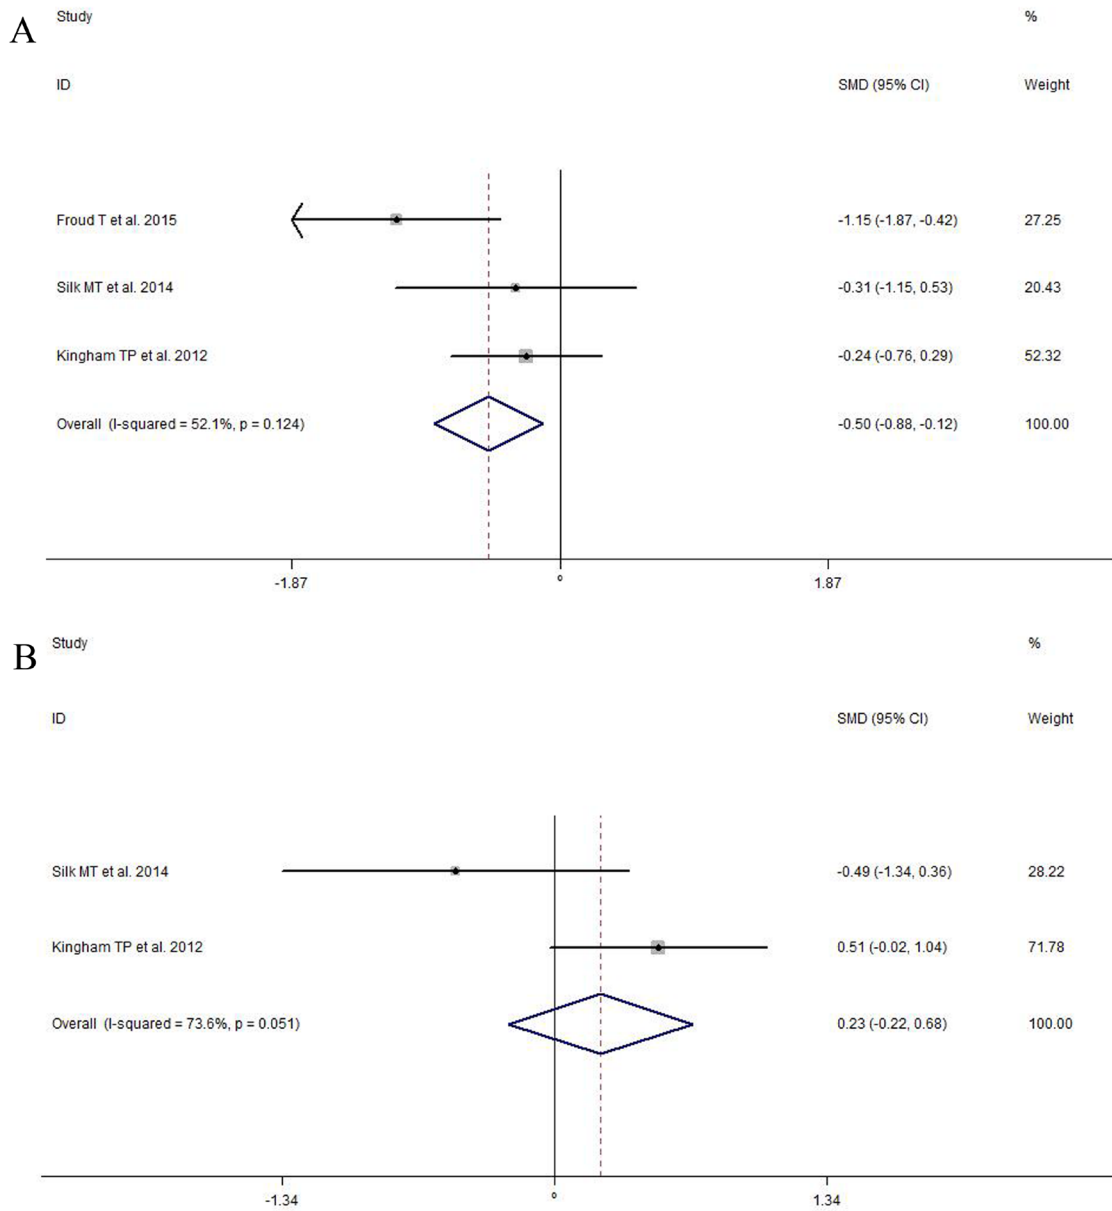

**Supplementary Figure 2:** ALP level change before and 1 **A.** and last follow-up month **B.** after IRE treatment. Comparing with the initial ALP level, the post-IRE ALP level increased at 1 day after IRE while unchanged at the last follow-up month.

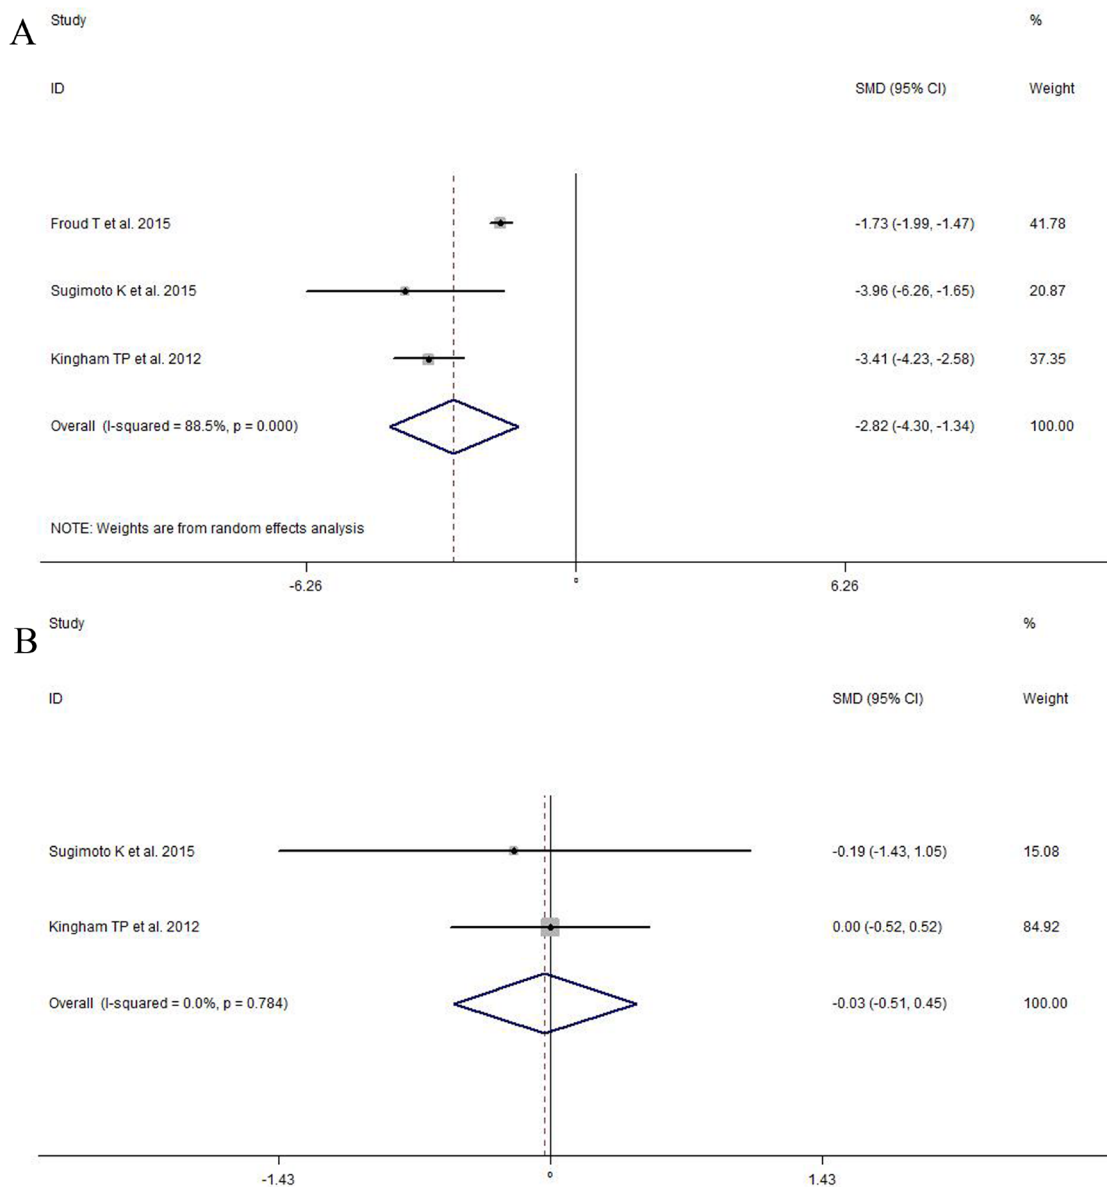

**Supplementary Figure 3:** AST level change before and 1 **A.** and last follow-up month **B.** after IRE treatment. Comparing with the initial AST level, the post-IRE AST level increased at 1 day after IRE while unchanged at the last follow-up month.

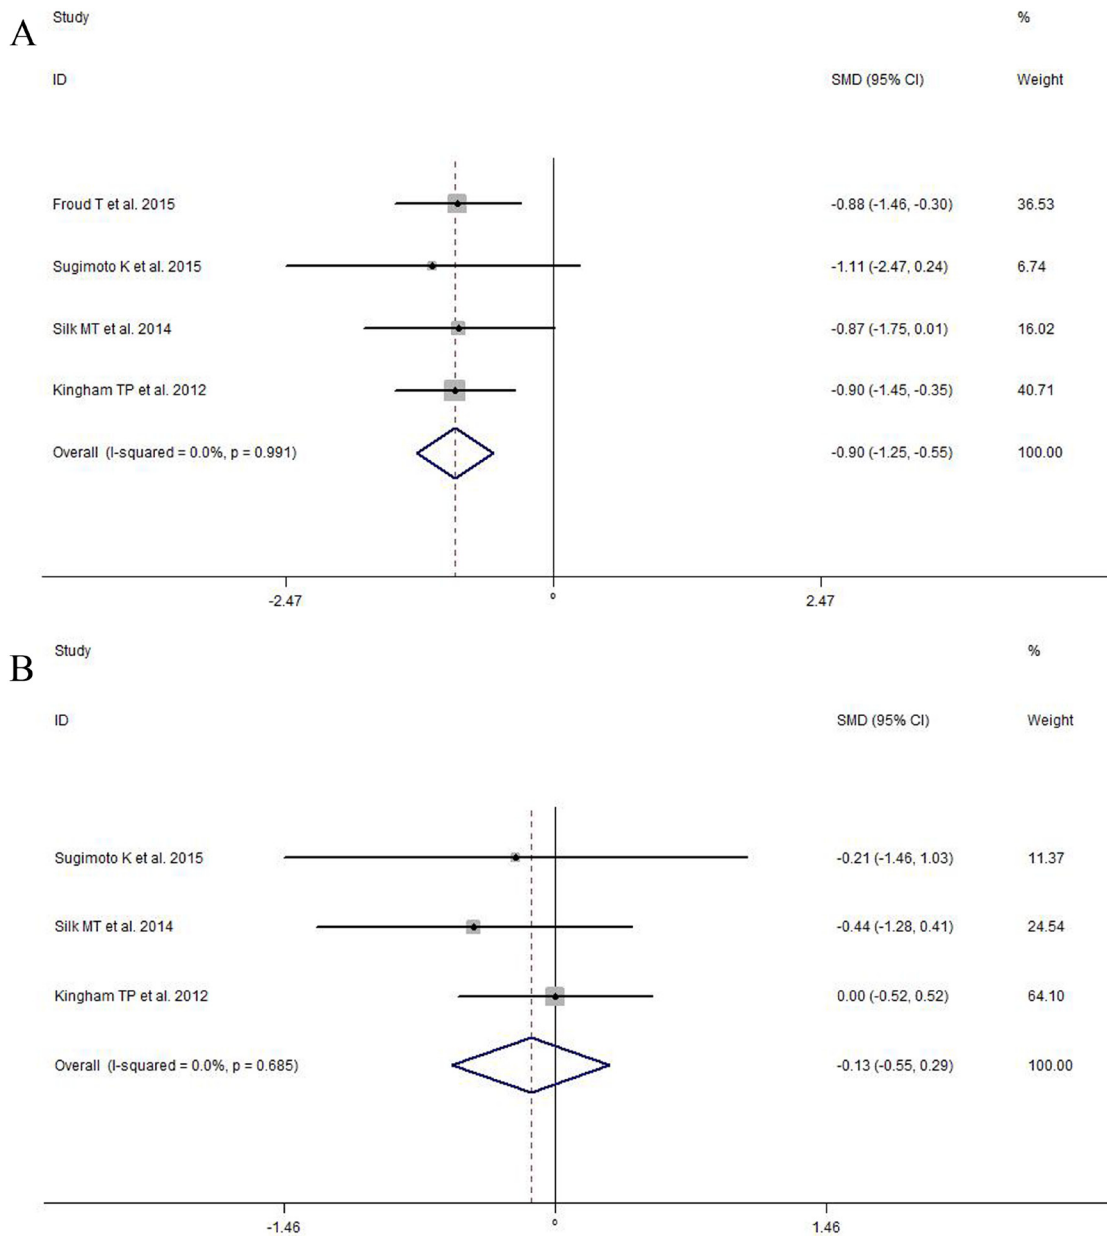

**Supplementary Figure 4:** Serum total bilirubin level change before and 1 **A.** and last follow-up month **B.** after IRE treatment. Comparing with the initial total bilirubin level, the post-IRE total bilirubin level increased at 1 day after IRE while unchanged at the last follow-up month.

Supplementary Table 1: NOS for the quality of the included literatures

| Study                   | Selection                      |                             |                       | Comparability          |                                                                     | Exposure                  |                                                     |                  | Total scores |
|-------------------------|--------------------------------|-----------------------------|-----------------------|------------------------|---------------------------------------------------------------------|---------------------------|-----------------------------------------------------|------------------|--------------|
|                         | Sufficient definition of cases | Representativeness of cases | Selection of controls | Definition of controls | Comparability of cases and controls based on the design or analysis | Ascertainment of exposure | Same method of ascertainment for cases and controls | Nonresponse rate |              |
| Dollinger M et al. 2016 | *                              | *                           | *                     | *                      | *                                                                   | *                         | *                                                   | *                | 8            |
| Padia SA et al. 2016    | *                              | *                           | *                     | *                      | *                                                                   | *                         | *                                                   | NA               | 7            |
| Barabasch A et al. 2016 | *                              | *                           | *                     | *                      | *                                                                   | *                         | *                                                   | NA               | 7            |
| Froud T et al. 2015     | *                              | *                           | *                     | *                      | **                                                                  | *                         | *                                                   | *                | 9            |
| Sugimoto K et al. 2015  | *                              | *                           | *                     | *                      | 0                                                                   | *                         | *                                                   | NA               | 6            |
| Niessen C et al. 2015   | *                              | *                           | *                     | *                      | *                                                                   | *                         | *                                                   | NA               | 7            |
| Silk MT et al. 2014     | *                              | *                           | *                     | *                      | 0                                                                   | *                         | *                                                   | NA               | 6            |
| Dollinger M et al. 2014 | *                              | *                           | *                     | *                      | *                                                                   | *                         | *                                                   | NA               | 7            |
| Kingham TP et al. 2012  | *                              | *                           | *                     | *                      | *                                                                   | *                         | *                                                   | NA               | 7            |

NOS: Newcastle-Ottawa Scale;  
NA: not available.
